# Supplementary material for: ATAT 1.1, the Automated Timing Accordance Tool for comparing ice-sheet model output with geochronological data
Source: Copernicus journal article supplement (doi:10.5194/gmd-12-933-2019), 2019-03-12
Supplement: Supplementary file 1 [file gmd-12-933-2019-supplement.zip]

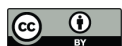

## *Supplement of*

# **ATAT 1.1, the Automated Timing Accordance Tool for comparing ice-sheet model output with geochronological data**

**Jeremy C. Ely et al.**

*Correspondence to:* Jeremy C. Ely ([j.ely@sheffield.ac.uk](mailto:j.ely@sheffield.ac.uk))

- [gmd-12-933-2019-supplement-title-page.pdf](#)
- [ATATv1.1.py](#)
- [ATATv1.1.py3](#)
- [GNU\\_license.txt](#)

The copyright of individual parts of the supplement might differ from the CC BY 4.0 License.
